# Supplementary material
Source: PubMed Central journal article supplement (PMC3986146)
Supplement: 1317731111_pnas.201317731SI.pdf [file 1317731111_pnas.201317731SI.pdf]

# Supporting Information

Chen et al. 10.1073/pnas.1317731111

## SI Methods

**T-Cell Factor/Lymphoid Enhancer Factor Reporter Experiments.** RD and 381T cells were seeded in 96-well clear-bottom plates (Fisher) at a density of  $5 \times 10^3$  cells per well and transfected with T-cell factor/lymphoid enhancer factor (TCF/LEF) dual-luciferase (firefly luciferase and Renilla) constructs essentially as described in the Qiagen TCF/LEF Signal Report Assay kit protocol. Firefly luciferase is driven by tandem repeats of TCF/LEF promoter element, whereas Renilla is expressed constitutively by a ubiquitous CMV promoter. Six hours after transfection, the media (10% FBS in DMEM) was changed, and cells were treated with 0.1% DMSO, BIO (200–1,000 nM), or Wnt-3a (400 ng/mL) for 24 h. Cells were supplemented with luciferase assay substrate from the Dual Luciferase Assay kit (Promega) and processed per the manufacturer's protocol before the measurement of luciferase activity using a microplate reader (Spectramax). There was a 10-s measurement period for each reporter assay, with the firefly luciferase activity quenched by the Stop and Glo reagent (supplied with the kit) before reading the Renilla luciferase activity. Each measurement of firefly luciferase activity was normalized to Renilla activity.

**Analysis of Zebrafish Embryonal Rhabdomyosarcoma.** Immunohistochemical analysis of zebrafish sections was performed essentially as previously described (1, 2) except for  $\beta$ -catenin (CTNNB1) staining, which was performed after antigen retrieval in EDTA buffer at 95 °C. Antibody dilutions used for immunohistochemistry on paraffin-embedded sections of zebrafish embryonal rhabdomyosarcoma (ERMS) were  $\beta$ -catenin (Sigma), 1:250; phospho-H3 (Millipore), 1:1,000. BGAR, biotinylated goat secondary anti-rabbit (Vector #BA-1000) was at 1:250 dilution. 5-ethynyl-2'-deoxyuridine (EdU) and Annexin stains were performed essentially as previously described (3).

**Isolation of Zebrafish Tumors for Quantitative RT-PCR.** Tumor tissue was isolated from ERMS-bearing fish treated with DMSO, BIO, or CHIR99021 by fine dissection. The tissue was macerated using a tissue grinder pestle and subsequently lysed in TRIzol reagent (Life Technologies). RNA extraction was performed per the manufacturer's protocol. RNA (500–1,000 ng) was used for cDNA synthesis using a High Capacity cDNA Reverse Transcription Kit (Life Technologies).

1. Chen EY, et al. (2013) Cross-species array comparative genomic hybridization identifies novel oncogenic events in zebrafish and human embryonal rhabdomyosarcoma. *PLoS Genet* 9(8):e1003727.
2. Langenau DM, et al. (2007) Effects of RAS on the genesis of embryonal rhabdomyosarcoma. *Genes Dev* 21(11):1382–1395.

3. Ignatius MS, et al. (2012) In vivo imaging of tumor-propagating cells, regional tumor heterogeneity, and dynamic cell movements in embryonal rhabdomyosarcoma. *Cancer Cell* 21(5):680–693.



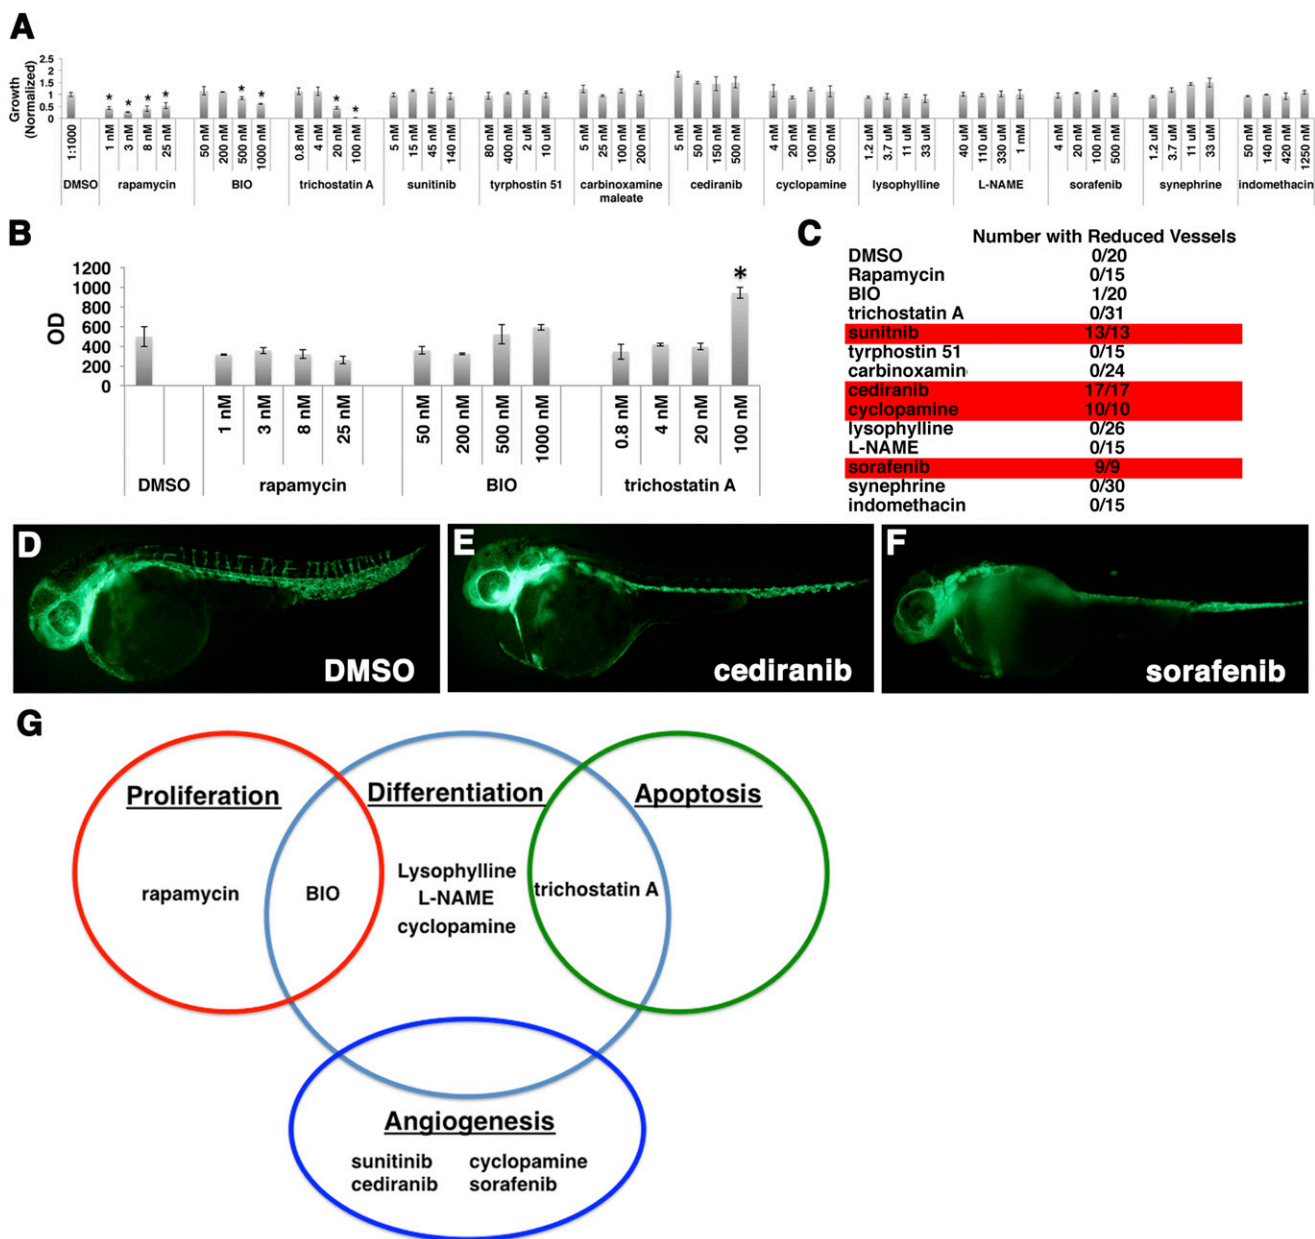

**Fig. S2.** Lead compounds functionally alter cancer-specific processes. (A) RD cells were treated with lead compounds from the zebrafish secondary screen at four concentrations in the range of  $IC_{50}$ . Cell growth/viability were assessed by cell titer glo after 4 d of drug treatment. Relative growth was normalized to cell numbers contained within each well at the beginning of the experiment. \*Statistical significance with  $P < 0.05$ . (B) Lead compounds that affected growth (rapamycin, BIO, and trichostatin A) were further tested for their role in regulating apoptosis using a caspase glo assay. Average OD values from triplicate plating in an assay are shown. Each error bar denotes SD. \* $P$  value  $< 0.05$ , Student  $t$  test comparing test compound and DMSO. (C) Summary of angiogenesis assay. Tg(*fli1*:GFP embryos) were treated with DMSO and lead compounds (50 nM–10  $\mu$ M) starting at early bud stage for 48 h. The effect of each compound on angiogenesis of intersegmental and tail vessels was assessed. Red indicates compounds that inhibit angiogenesis in *fli1*:GFP embryos. (D–F) Representative images of DMSO-treated (D), cediranib-treated (E), and sorafenib-treated (F) *fli1*:GFP embryos are shown. (G) Venn diagram summarizing functional categories of lead compounds in ERMS tumorigenesis.



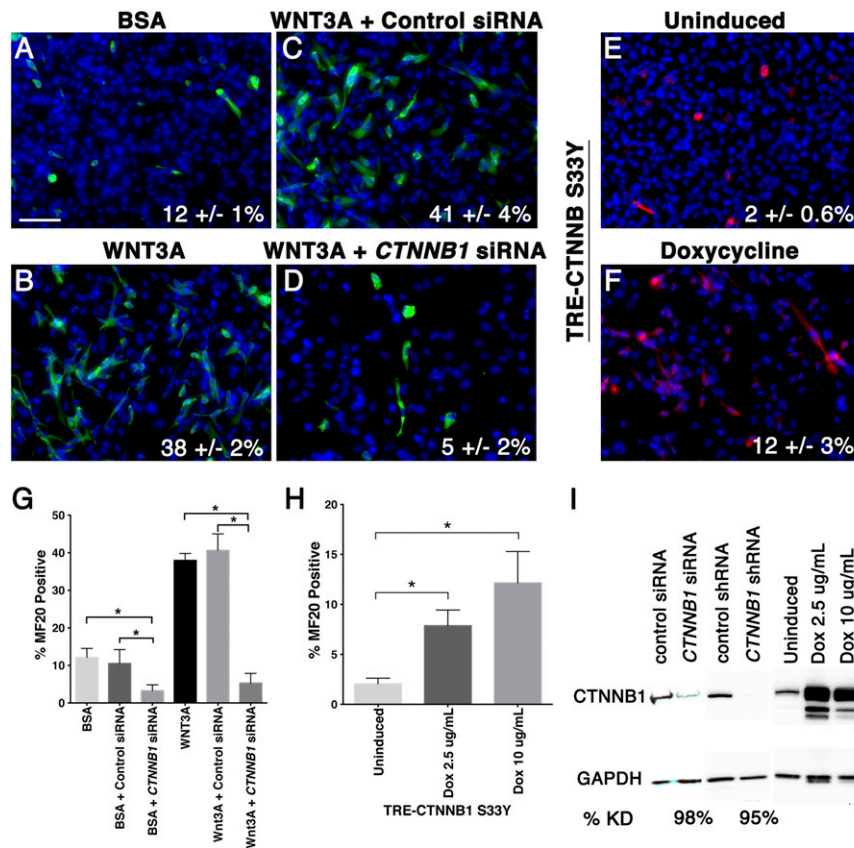

**Fig. 54.** Activation of canonical WNT pathway induces differentiation in 381T ERMS cells. (A–D) Immunofluorescent analysis for MF20 expression in human 381T ERMS cell line treated with BSA (A) and WNT3A (400 ng/mL) (B), transfected with control siRNA (C) and *CTNNB1* siRNA (D) in the presence of WNT3A. \*Statistically significant differences between experimental and control treated cells ( $P < 0.05$ ). (Scale bar, 100  $\mu\text{m}$ .) (E and F) 381T cells were engineered to express a doxycycline-inducible CTNNB1S33Y that constitutively activates the canonical WNT/ $\beta$ -catenin pathway. Uninduced control (E) and induced (F) cells stained with MF20 (red) and DAPI (blue). (G) Summary of MF20 staining in cells treated with Wnt-3a, BSA (vehicle control), control siRNA, and *CTNNB1* siRNA. (H) Summary of MF20 staining in stable cell lines harboring doxycycline-inducible CTNNB1S33Y. (I) Western blot analysis. Percentage of knockdown is noted.

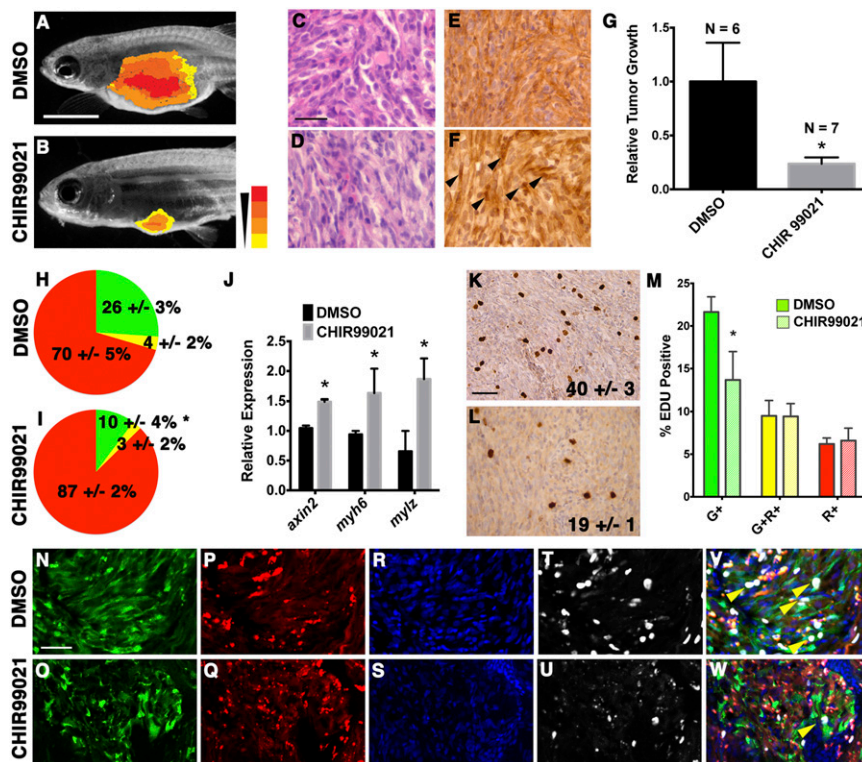

**Fig. S5.** CHIR99021 inhibits ERMS tumor growth and alters differentiation of tumor cells. (A and B) Representative images of ERMS-bearing fish after 6 d of drug treatment with DMSO (A) or 400 nM CHIR99021 (B). (Scale bar, 0.2 cm.) Heat map scale indicates increasing tumor volume intensity. (C–F) H&E-stained sections (C and D) and immunohistochemistry for  $\beta$ -catenin (E and F). (Scale bar, 20  $\mu$ m.) (G) Summary of tumor volume changes. N, number of tumor-bearing fish per treatment group. Each error bar denotes SEM. (H and I) Summary of frequency of tumor cell subpopulations upon treatment with (H) DMSO (vehicle) and (I) CHIR99021 by FACS analysis. Each pie chart represents an average of three tumor-bearing fish analyzed, showing the relative percentage of  $myf5:GFP^+/mylz2:mCherry^-$  tumor-propagating cells (green),  $myf5:GFP^+/mylz2:mCherry^+$  (yellow), and late-differentiating  $myf5:GFP^-/mylz2:mCherry^+$  cells (red). SD for each fraction is indicated. \*Significance of <0.05. (J) Quantitative RT-PCR analysis. \* $P < 0.05$ , Student  $t$  test. Each error bar indicates SEM.  $n = 3$ –4 tumors analyzed for each treatment group. (K and L) Immunohistochemistry for Phospho-H3 for DMSO- (K) and CHIR99021-treated (L) tumors. The number of Phospho-H3-positive cells was quantified in three independent fields at 400 $\times$  magnification. The values (with SEM) indicate average of three tumors analyzed for each treatment group ( $P < 0.05$ ). (Scale bar, 20  $\mu$ m.) (M) Summary of EdU analysis. Larval fish engrafted with tumors expressing  $myf5:GFP$  and  $mylz2:mCherry$  were treated with DMSO or CHIR99021 and pulsed with EdU for IF analysis. Each error bar indicates SEM of three tumors from each treatment group. \* $P < 0.005$ , Student  $t$  test. (N–W) Representative images from EdU IF staining. GFP (N and O), mCherry (P and Q), DAPI (R and S), and EdU (T and U). (V and W) Merge image of all four channels. Yellow arrowheads, representative  $myf5:GFP^+/mylz2:mCherry^-$  cells that have EdU incorporation. (Scale bar, 20  $\mu$ m.)

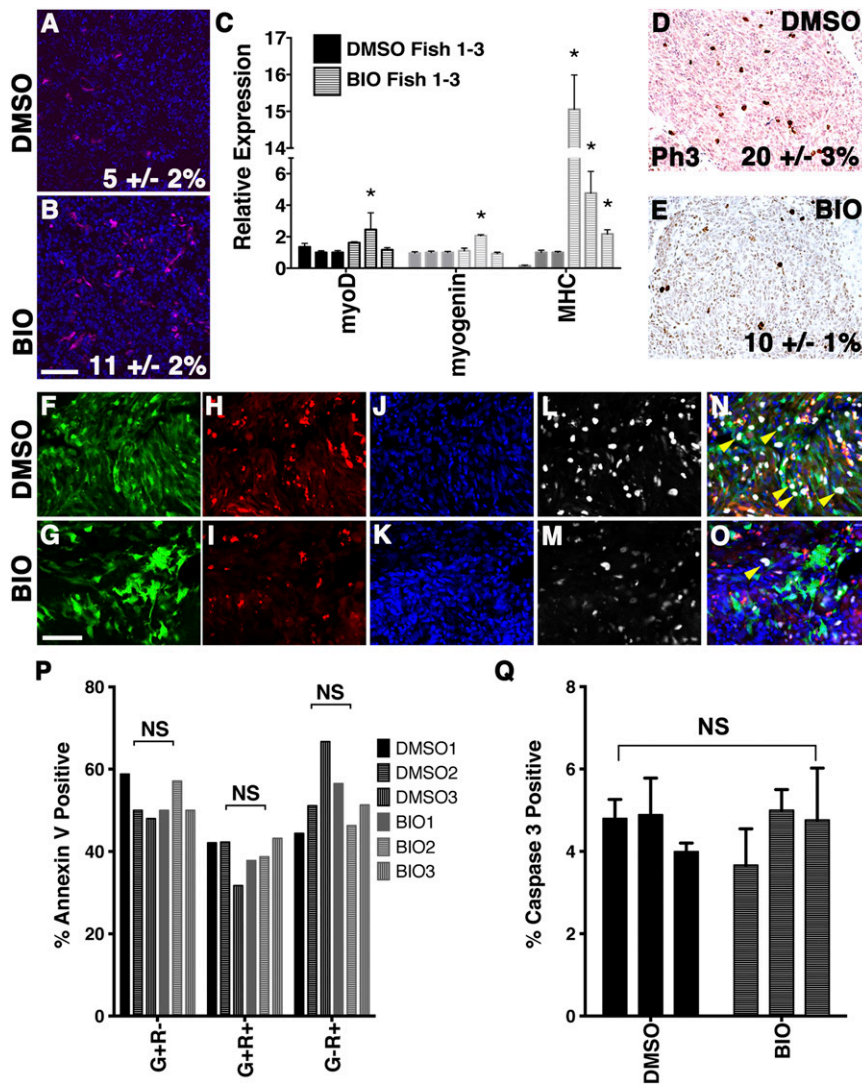

**Fig. 56.** BIO alters the differentiation status of zebrafish ERM tumor cells. (A–C) Transplanted ERMS tumor-bearing larval zebrafish were treated with DMSO and BIO (300 nM) for 5 d. MF20 staining was performed on cryosections of treated tumors to assess the extent of terminal differentiation. (A) DMSO-treated tumor. (B) BIO-treated tumor. Three independent tumors from each treatment group were analyzed. Average percentage of MF20-positive cells  $\pm$ SD are noted. (Scale bar, 20  $\mu$ M.) (C) Real-time RT-PCR assessing expression of myogenic markers in DMSO- and BIO-treated fish ( $n = 3$ ). Error bar indicates SD across experimental triplicate. \* $P < 0.05$  in comparison with the DMSO-treatment group. Myosin heavy chain-6 (*mhc*). (D and E) Immunohistochemistry for Phospho-H3. The number of Phospho-H3-positive cells was quantified in three independent fields at 400 $\times$  magnification. The values (with SEM) indicate average of three tumors analyzed for each treatment group. (F–O) EdU analysis. Larval fish engrafted with tumors expressing *myf5*:GFP and *mylz2*:mCherry were treated with DMSO or BIO and pulsed with EdU for immunofluorescence (IF) analysis. GFP (F and G), mCherry (H and I), DAPI (J and K), and EdU (L and M). (N and O) Merge image of all four channels. Yellow arrowheads denote representative *myf5*:GFP<sup>+</sup>/*mylz2*:mCherry<sup>-</sup> cells that have EdU incorporation. (Scale bar, 50  $\mu$ M.) (P) Analysis of apoptosis by Annexin V staining after multiparameter FACS. (Q) Quantitation of caspase-3 immunohistochemical staining. Average of number of positive cells in three high-power (400 $\times$  magnification) fields is shown for three independent tumors treated with either DMSO or BIO. Each error bar indicates SD. NS, not significant.

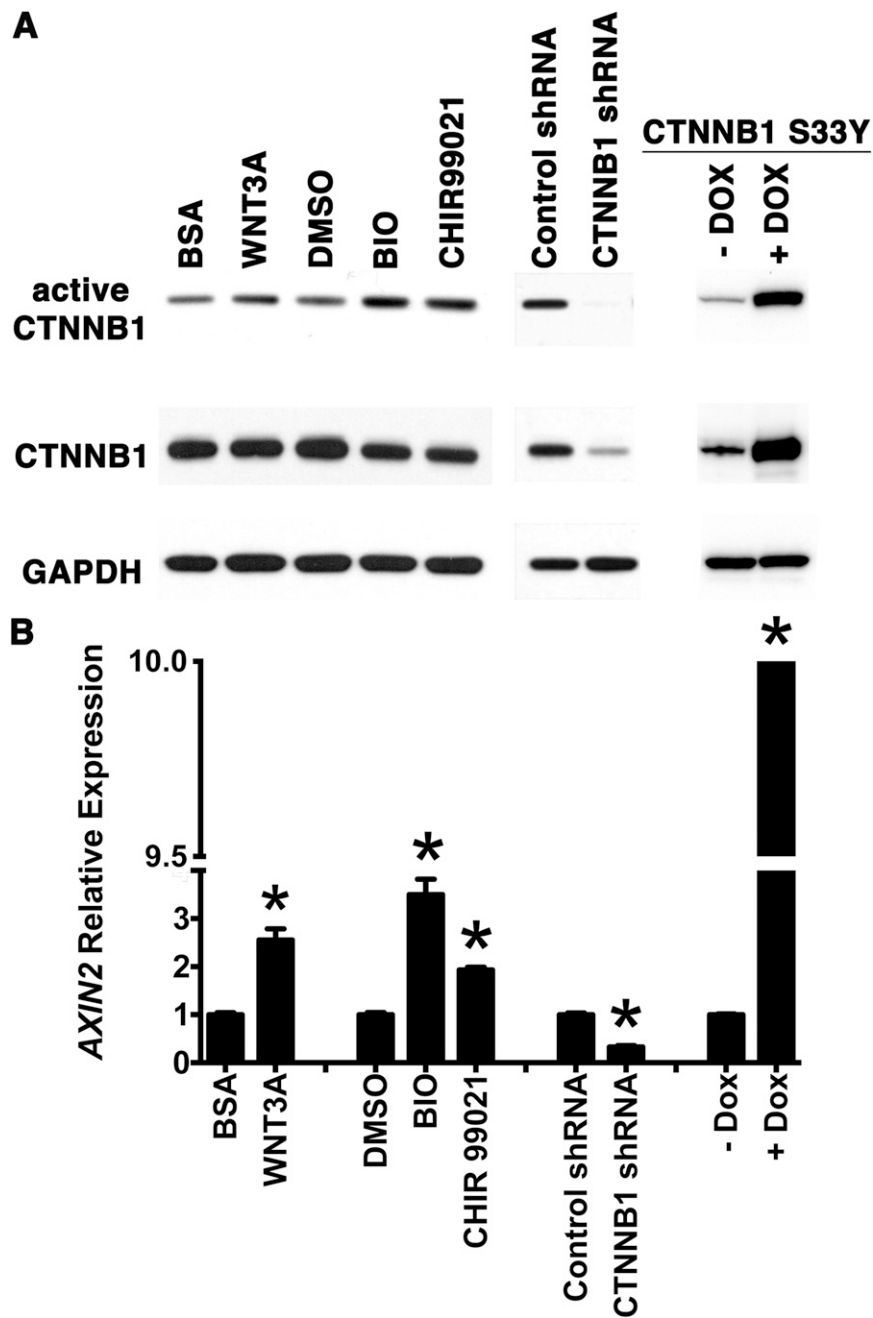

**Fig. S7.** Human ERMS spheres activate canonical WNT signaling upon stimulation. (A) Western blot analysis for active nonphosphorylated CTNNB1 (Ser33/37/Thr41) and total CTNNB1 in spheres derived from the RD cell line treated with BSA (carrier only control), WNT3A, DMSO (vehicle control), BIO, and CHIR 99021, as well as cells stably transduced with control shRNA, CTNNB1shRNA, and doxycycline (DOX)-inducible CTNNB1 S33Y. (B) Quantitative RT-PCR analysis of canonical WNT target gene, *AXIN2*, in treated spheres derived from the RD cell line. Each error bar indicates SD of experimental triplicate. \* $P < 0.05$  in comparison with the control treatment group.



**Table S1. Remaining nonhit compounds from the zebrafish tumor growth screen**

| Compound                 | (%) |     | Animal replicates (%) |     |     |
|--------------------------|-----|-----|-----------------------|-----|-----|
| Valinomycin              | 0.2 | 53  | 63                    | 92  | 109 |
| Vincristine              | 17  | 34  | 57                    | 119 | 125 |
| Cyclophosphamide         | 60  | 80  | 97                    | 119 |     |
| Ketotifen fumarate       | 45  | 72  | 85                    | 96  |     |
| OBAA                     | 47  | 73  | 152                   | 85  | 107 |
| Ronidazole               | 48  | 62  | 77                    | 103 |     |
| 5-Azacytidine            | 53  | 62  | 193                   | 63  | 120 |
| Pazopanib                | 65  | 76  | 119                   | 85  | 118 |
| Tropine                  | 104 | 109 | 109                   | D   | D   |
| $\gamma$ -Secretase I    | 120 | 222 | 231                   | 234 | D   |
| RG-108                   | 180 | 211 | 231                   | 283 | D   |
| PI-103                   | 178 | 231 | 211                   | 327 | D   |
| Compound E               | 121 | 91  | 231                   | D   | D   |
| NS-398                   | 71  | 99  | 99                    | D   | D   |
| N-NLAM                   | 224 | 116 | 228                   | 93  | D   |
| 9-cis-retinoid a         | 79  | 169 | D                     | D   | D   |
| XK-469                   | 15  | 191 | 245                   | 32  | D   |
| Mycophenolic Acid        | 110 | 140 | 256                   | 454 | D   |
| Clidinium bromide        | 47  | 65  | 145                   | 145 | D   |
| NMDA                     | 65  | 90  | 99                    | 160 | 365 |
| Purpurogallin            | 57  | 85  | D                     | D   | D   |
| Catechin                 | 72  | 113 | D                     | D   | D   |
| Fluorometholone          | 126 | 254 | D                     | D   | D   |
| NAD                      | 44  | 53  | 80                    | 160 | D   |
| Hesperetin               | 91  | 120 | D                     | D   | D   |
| Isoetharine mesylate     | 63  | 90  | 98                    | 150 | D   |
| Levamisole HCl           | 25  | 76  | 166                   | 200 | D   |
| Dipyrrone                | 107 | 126 | 270                   | 271 | D   |
| Clobetasol propionate    | 53  | 58  | 67                    | 134 | D   |
| Trioxsalen               | 28  | 62  | 80                    | 120 | D   |
| Tyrphostin AG-358        | 67  | 75  | 77                    | 93  | D   |
| Pyrrolidine carbothionic | 13  | 66  | D                     | D   | D   |
| B581                     | 32  | 52  | 92                    | D   | D   |
| Suprofen                 | 33  | 57  | 65                    | 83  | 128 |
| PGE                      | 65  | 86  | 87                    | 105 | D   |
| Tamoxifen citrate        | 25  | 108 | 117                   | D   | D   |
| LiCl                     | 131 | 226 | 303                   | D   | D   |
| Lidoflazine              | 54  | 61  | 80                    | 103 |     |
| Ordansetron              | 103 | D   | D                     | D   | D   |
| Wortmannin               | D   | D   | D                     | D   | D   |
| Lovastatin               | D   | D   | D                     | D   | D   |
| N-P-TPCK                 | D   | D   | D                     | D   | D   |
| Bortezomib               | D   | D   | D                     | D   | D   |
| Cinngel                  | D   | D   | D                     | D   | D   |
| Antimycin A              | D   | D   | D                     | D   | D   |
| Tyrphostin A9            | D   | D   | D                     | D   | D   |
| Oligomycin               | D   | D   | D                     | D   | D   |
| Simvastatin              | D   | D   | D                     | D   | D   |

**Table S1. Cont.**

| Compound                         | (%)                                                                                 |                               |   |   |   | Animal replicates (%) |
|----------------------------------|-------------------------------------------------------------------------------------|-------------------------------|---|---|---|-----------------------|
| Menandione                       | D                                                                                   | D                             | D | D | D | D                     |
| Benzyl-isothiocyanate            | D                                                                                   | D                             | D | D | D | D                     |
| Eodin                            | D                                                                                   | D                             | D | D | D | D                     |
| Aceclofenac                      | D                                                                                   | D                             | D | D | D | D                     |
| 5,7-dichloro-8-quinolinol        | D                                                                                   | D                             | D | D | D | D                     |
| Celastrol                        | D                                                                                   | D                             | D | D | D | D                     |
| Clofibrate                       | D                                                                                   | D                             | D | D | D | D                     |
| Ciclopirox olamine               | D                                                                                   | D                             | D | D | D | D                     |
| 2,2 thiobis (4,6 dichlorophenol) | D                                                                                   | D                             | D | D | D | D                     |
| Promazine hydrochloride          | D                                                                                   | D                             | D | D | D | D                     |
| Benzbromarone                    | D                                                                                   | D                             | D | D | D | D                     |
| Tracozolate hydrochloride        | D                                                                                   | D                             | D | D | D | D                     |
| Haloperidol                      | D                                                                                   | D                             | D | D | D | D                     |
| Riluzole                         | D                                                                                   | D                             | D | D | D | D                     |
| Loperamide hydrochloride         | D                                                                                   | D                             | D | D | D | D                     |
| Rosuvastatin                     | D                                                                                   | D                             | D | D | D | D                     |
| 6-methoxyharmalan                | D                                                                                   | D                             | D | D | D | D                     |
| SFK-95282                        | D                                                                                   | D                             | D | D | D | D                     |
| Echinomycin                      | D                                                                                   | D                             | D | D | D | D                     |
| H-89 dihydrochloride             | D                                                                                   | D                             | D | D | D | D                     |
| (+)-bicuculline                  | D                                                                                   | D                             | D | D | D | D                     |
|                                  |    | 0–20% relative growth to DMSO |   |   |   |                       |
|                                  |   | 21–50%                        |   |   |   |                       |
|                                  |  | >50%                          |   |   |   |                       |
|                                  |  | Death from drug toxicity      |   |   |   |                       |

**Table S2. RT-PCR primer sequences**


---

|              |         |                         |
|--------------|---------|-------------------------|
| Zebrafish    |         |                         |
| <i>18S</i>   | Forward | TCGCTAGTTGGCATCGTTTATG  |
|              | Reverse | CGGAGGTTCGAAGACGATCA    |
| <i>myca</i>  | Forward | TATGCTGCAAGTGACCGGAG    |
|              | Reverse | TCACCGGCATTTTGACACTTG   |
| <i>ccnd1</i> | Forward | TGGACAGACGTCAACTTCA     |
|              | Reverse | CAGTCAACAGTTTGGGCGTG    |
| <i>axin2</i> | Forward | GATAGCCAGACTGGAGCG      |
|              | Reverse | CGCTCTTCCTCCTGATC       |
| <i>mylz2</i> | Forward | ACCGCAGAGGAGATGAAGAA    |
|              | Reverse | TCCGTGTGTGATGACGTAGC    |
| <i>myh6</i>  | Forward | CAGCTGGAGGAGAAGGAATG    |
|              | Reverse | CCTCAAGTTCCTTCTCAGG     |
| Human        |         |                         |
| <i>AXIN2</i> | Forward | AAACGCAATGGGAAAGGCAC    |
|              | Reverse | TGTGCTTTGGGCACTATGGG    |
| <i>CCND1</i> | Forward | ACACGACTACAGGGGAGTT     |
|              | Reverse | GTTCTCGCAGACCTCCAG      |
| <i>cMYC</i>  | Forward | CAGCGACTCTGAGGAGGAAC    |
|              | Reverse | GCTGGTGCATTTTCGGTTGT    |
| <i>GAPDH</i> | Forward | GGTGGTCTCCTCTGACTTCAACA |
|              | Reverse | GTTGCTGTAGCCAAATTCGTTGT |

---
